# Supplementary material for: FeGenie: a comprehensive tool for the identification of iron genes and iron gene neighborhoods in genomes and metagenome assemblies
Source: bioRxiv preprint, doi:10.1101/777656, version 1 (2019-09-23)
Supplement: Supplemental File 2 [file 777656_file05.csv]

X	GCA_000007005.1_ASM700v1_genomic.fna	GCA_000008265.1_ASM826v1_genomic.fna	GCA_000009965.1_ASM996v1_genomic.fna	GCA_000011005.1_ASM1100v1_genomic.fna	GCA_000011085.1_ASM1108v1_genomic.fna	GCA_000011585.1_ASM1158v1_genomic.fna	GCA_000012545.1_ASM1254v1_genomic.fna	GCA_000013725.1_ASM1372v1_genomic.fna	GCA_000014945.1_ASM1494v1_genomic.fna	GCA_000015145.1_ASM1514v1_genomic.fna	GCA_000015225.1_ASM1522v1_genomic.fna	GCA_000016525.1_ASM1652v1_genomic.fna	GCA_000016605.1_ASM1660v1_genomic.fna	GCA_000017685.1_ASM1768v1_genomic.fna	GCA_000017945.1_ASM1794v1_genomic.fna	GCA_000018305.1_ASM1830v1_genomic.fna	GCA_000019605.1_ASM1960v1_genomic.fna	GCA_000019805.1_ASM1980v1_genomic.fna	GCA_000021965.1_ASM2196v1_genomic.fna	GCA_000022205.1_ASM2220v1_genomic.fna	GCA_000023945.1_ASM2394v1_genomic.fna	GCA_000023965.1_ASM2396v1_genomic.fna	GCA_000025505.1_ASM2550v1_genomic.fna	GCA_000025625.1_ASM2562v1_genomic.fna	GCA_000025865.1_ASM2586v1_genomic.fna	GCA_000026045.1_ASM2604v1_genomic.fna	GCA_000069025.1_ASM6902v1_genomic.fna	GCA_000091665.1_ASM9166v1_genomic.fna	GCA_000092185.1_ASM9218v1_genomic.fna	GCA_000092465.1_ASM9246v1_genomic.fna	GCA_000092845.1_ASM9284v1_genomic.fna	GCA_000144915.1_ASM14491v1_genomic.fna	GCA_000145985.1_ASM14598v1_genomic.fna	GCA_000147875.1_ASM14787v1_genomic.fna	GCA_000148385.1_ASM14838v1_genomic.fna	GCA_000152265.2_ASM15226v2_genomic.fna	GCA_000166095.1_ASM16609v1_genomic.fna	GCA_000172995.2_ASM17299v2_genomic.fna	GCA_000179575.2_ASM17957v2_genomic.fna	GCA_000183745.1_ASM18374v1_genomic.fna	GCA_000190435.1_ASM19043v1_genomic.fna	GCA_000193375.1_ASM19337v1_genomic.fna	GCA_000195335.1_ASM19533v1_genomic.fna	GCA_000195895.1_ASM19589v1_genomic.fna	GCA_000195915.1_ASM19591v1_genomic.fna	GCA_000196215.1_ASM19621v1_genomic.fna	GCA_000196275.1_ASM19627v1_genomic.fna	GCA_000196655.1_ASM19665v1_genomic.fna	GCA_000196895.1_ASM19689v1_genomic.fna
iron_aquisition-iron_transport	0.0	0.0	4.753673292999135	0.6546644844517185	1.1228385358185493	2.287021154945683	1.288659793814433	2.293577981651376	1.1049723756906078	2.1881838074398248	6.732263076126359	1.6835016835016834	0.0	1.083130246412131	0.0	0.0	1.1883541295306002	0.9751340809361286	1.7992083483267363	2.195992314026901	2.3003614853762735	0.8860011813349085	1.1542901115813775	1.389854065323141	3.976143141153081	1.404001404001404	1.0826416456153014	1.0655301012253595	4.240282685512367	2.430133657351154	1.3947001394700138	0.0	1.0005002501250624	2.1269053527118045	0.7782101167315175	0.0	6.828528072837633	1.770359129994942	3.6036036036036037	2.097315436241611	5.535656138065777	0.9099181073703367	3.532008830022075	2.969561989606533	0.0	0.0	1.2674271229404308	3.745318352059925	1.2738853503184713
iron_aquisition-heme_transport	0.0	0.0	0.43215211754537597	0.6546644844517185	0.22456770716370986	0.0	0.0	0.382262996941896	0.0	0.0	0.0	0.0	0.0	0.8123476848090982	0.0	0.0	0.0	0.0	0.0	0.2744990392533626	0.6572461386789353	0.29533372711163614	0.38476337052712584	0.23164234422052352	0.0	0.351000351000351	0.36088054853843377	0.0	0.0	0.0	0.0	0.0	0.0	1.0634526763559022	0.0	0.0	0.0	0.25290844714213456	0.0	0.41946308724832215	0.32562683165092804	0.0	0.44150110375275936	0.0	0.0	0.0	0.6337135614702154	0.0	0.25477707006369427
iron_aquisition-heme_oxygenase	0.0	0.0	0.0	0.0	0.0	0.0	0.0	0.0	0.0	0.0	0.0	0.0	0.0	0.0	0.0	0.0	0.0	0.0	0.0	0.0	0.0	0.0	0.0	0.0	0.0	0.0	0.0	0.0	0.0	0.0	0.0	0.0	0.0	0.0	0.0	0.0	0.0	0.0	0.0	0.0	0.0	0.0	0.0	0.0	0.0	0.0	0.0	0.0	0.0
iron_aquisition-siderophore_synthesis	0.0	0.0	0.0	0.0	0.0	0.0	0.0	0.0	0.0	0.0	0.0	0.0	0.0	0.0	0.0	0.0	0.0	0.0	0.0	0.0	0.0	2.067336089781453	0.0	0.0	0.0	0.0	2.165283291230603	0.0	0.0	0.0	0.0	0.0	0.0	0.0	0.0	0.0	0.0	1.5174506828528074	0.0	0.0	0.9768804949527842	0.0	0.0	0.0	0.0	0.0	0.0	0.0	1.5286624203821655
iron_aquisition-siderophore_transport	0.6095702529716549	1.2507817385866167	2.592912705272256	1.9639934533551553	1.571973950145969	5.717552887364208	0.0	4.587155963302752	7.734806629834255	1.0940919037199124	1.5535991714137751	2.805836139169472	0.836470096194061	5.686433793663688	1.3422818791946307	0.9629272989889263	0.0	4.388103364212579	1.4393666786613888	1.9214932747735383	3.286230693394676	2.9533372711163612	1.923816852635629	0.46328468844104703	4.473161033797217	0.702000702000702	2.88704438830747	4.794885455514118	1.4134275618374557	1.215066828675577	1.0460251046025104	1.3315579227696406	3.501750875437719	11.343495214462957	1.9455252918287937	1.0251153254741159	0.0	1.5174506828528074	1.8018018018018018	1.6778523489932886	3.9075219798111367	0.9099181073703367	1.7660044150110374	8.413758970551845	1.2738853503184713	0.0	4.752851711026616	2.0807324178110695	1.78343949044586
iron_gene_regulation	0.6095702529716549	1.2507817385866167	0.43215211754537597	1.309328968903437	0.6737031214911295	1.1435105774728416	0.0	1.146788990825688	0.0	0.5470459518599562	2.0714655618850335	0.5611672278338945	0.836470096194061	1.083130246412131	0.0	0.0	1.1883541295306002	0.4875670404680643	1.4393666786613888	0.2744990392533626	0.6572461386789353	0.29533372711163614	0.38476337052712584	0.46328468844104703	1.4910536779324055	0.702000702000702	0.7217610970768675	0.5327650506126798	0.7067137809187278	0.0	0.0	0.0	1.5007503751875937	1.772421127259837	0.0	1.0251153254741159	0.7587253414264037	0.7587253414264037	1.2012012012012012	0.41946308724832215	1.9537609899055683	0.0	0.8830022075055187	0.989853996535511	1.2738853503184713	1.0845986984815619	0.3168567807351077	2.0807324178110695	0.25477707006369427
iron_oxidation	0.6095702529716549	0.6253908692933083	0.0	0.0	0.0	0.0	0.0	0.0	0.0	0.0	0.0	0.0	2.509410288582183	0.0	0.0	0.0	0.0	0.0	0.0	0.0	0.0	0.0	0.38476337052712584	0.0	0.0	0.0	0.0	0.0	0.0	0.0	0.0	0.0	0.0	0.0	0.0	0.5125576627370579	0.0	0.0	0.0	0.0	0.0	0.0	0.0	0.0	0.0	0.0	0.0	0.0	0.0
possible_iron_oxidation_and_possible_iron_reduction	0.0	0.0	0.0	0.0	0.0	0.0	0.0	0.0	0.0	0.0	0.0	0.0	0.0	0.0	0.0	0.0	0.0	0.0	0.0	0.0	0.0	0.0	0.0	0.0	0.0	0.0	0.0	0.0	0.0	0.0	0.0	0.0	0.0	0.0	0.0	0.0	0.0	0.0	0.0	0.0	0.0	0.0	0.0	0.0	0.0	0.0	0.0	0.0	0.0
probable_iron_reduction	0.0	0.0	0.0	0.0	0.0	0.0	0.0	0.0	0.0	0.0	0.0	0.0	0.0	0.0	0.0	0.0	0.0	0.0	0.0	0.0	0.0	0.0	0.0	0.0	0.0	0.0	0.0	0.0	0.0	0.0	0.0	0.0	0.0	0.0	0.0	0.0	0.0	0.0	0.0	0.0	0.0	0.0	0.0	0.0	0.0	0.0	0.0	0.0	0.0
iron_reduction	0.0	0.0	0.0	0.0	0.0	0.0	0.0	0.0	0.0	0.0	0.0	0.0	0.0	0.0	0.0	0.0	0.0	0.0	0.0	0.0	0.0	0.0	0.0	0.0	0.0	0.0	0.0	0.0	0.0	0.0	0.0	0.0	0.0	0.0	0.0	0.0	0.0	0.0	0.0	0.0	0.0	0.0	0.0	0.0	0.0	0.0	0.0	0.0	0.0
iron_storage	0.30478512648582745	0.0	2.16076058772688	0.9819967266775776	0.22456770716370986	1.1435105774728416	0.0	0.382262996941896	0.5524861878453039	0.0	0.0	0.5611672278338945	0.4182350480970305	0.5415651232060655	0.0	0.0	0.5941770647653001	0.0	0.7196833393306944	0.8234971177600879	0.6572461386789353	0.8860011813349085	0.38476337052712584	0.46328468844104703	0.9940357852882703	0.351000351000351	0.36088054853843377	0.0	0.7067137809187278	0.0	0.6973500697350069	0.0	0.5002501250625312	0.3544842254519674	0.0	0.0	0.0	0.7587253414264037	0.6006006006006006	0.8389261744966443	0.6512536633018561	0.0	0.8830022075055187	0.4949269982677555	0.0	1.0845986984815619	0.9505703422053232	1.6645859342488556	1.5286624203821655
magnetosome_formation	0.0	0.0	0.0	0.0	0.0	0.0	0.0	0.0	0.0	0.0	0.0	0.0	0.0	0.0	0.0	0.0	0.0	0.0	0.0	0.0	0.0	0.0	0.0	0.0	0.0	0.0	0.0	0.0	0.0	0.0	0.0	0.0	0.0	0.0	0.0	0.0	0.0	0.0	0.0	0.0	0.0	0.0	0.0	0.0	0.0	0.0	0.0	0.0	0.0
[truncated: 327 more columns]
